# Supplementary material for: Design of porous C@Fe3O4hybrid nanotubes with excellent microwave absorption
Source: Royal Society of Chemistry journal article supplement (doi:10.1039/c5cp06687e), 2015-12-03
Supplement: c5cp06687e1.pdf [file c5cp06687e1.pdf]

## Supporting Information

### **Design of porous C@Fe<sub>3</sub>O<sub>4</sub> hybrid nanotubes toward their excellent microwave absorption**

Fanbin Meng\*, Wei Wei, Xiangnan Chen, Xiaoling Xu, Man Jiang, Lu Jun, Yong Wang and Zuowan Zhou\*

Key Laboratory of Advanced Technologies of Materials (Ministry of Education), School of Materials Science and Engineering, Southwest Jiaotong University, Chengdu 610031, China.

E-mail: mengfanbin\_wing@126.com, zwzhou@home.swjtu.edu.cn.

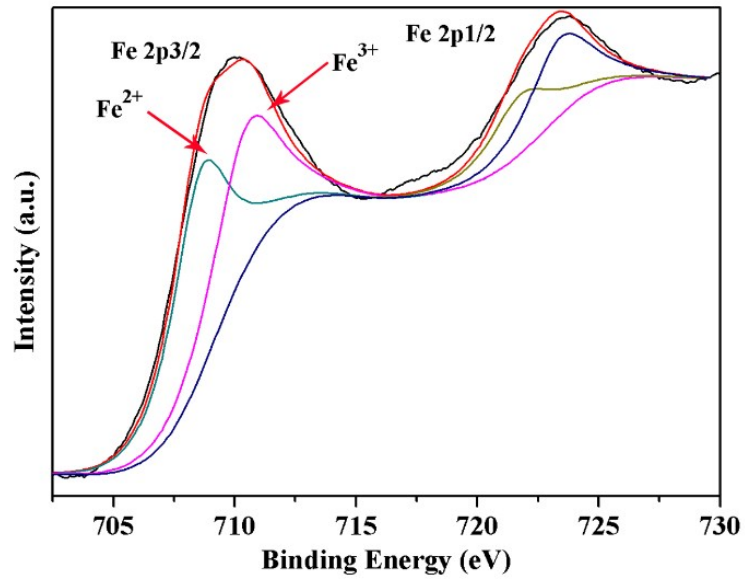

Fig. S1 XPS spectra of Fe 2p for porous Carbon@Fe<sub>3</sub>O<sub>4</sub> core-shell nanotubes

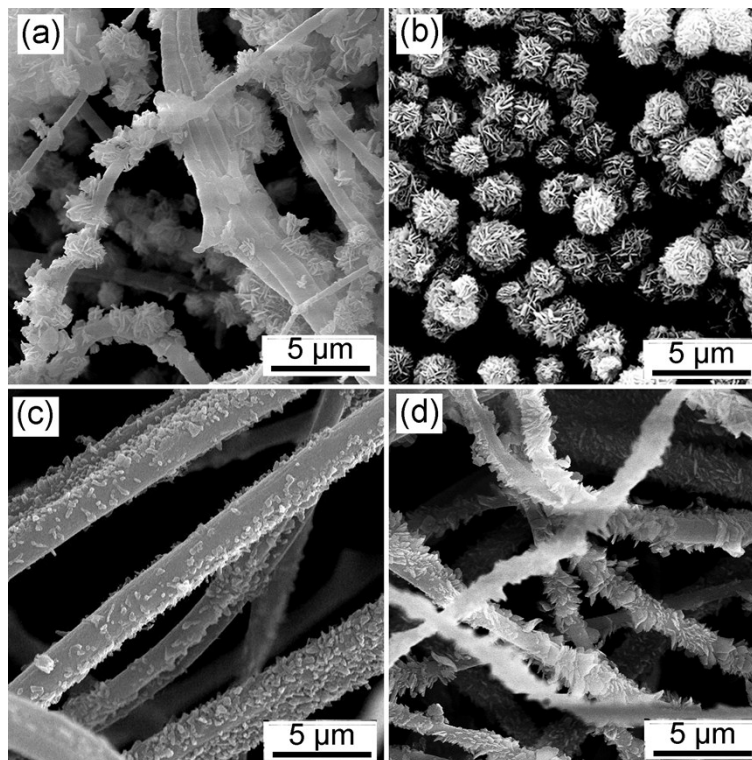

Fig. S2 SEM images of PAN/iron alkoxide nanofibers (a), flower-like iron alkoxide (b); PVA/iron alkoxide nanofibers with different reaction time: 0 min (c) and 5 min (d).

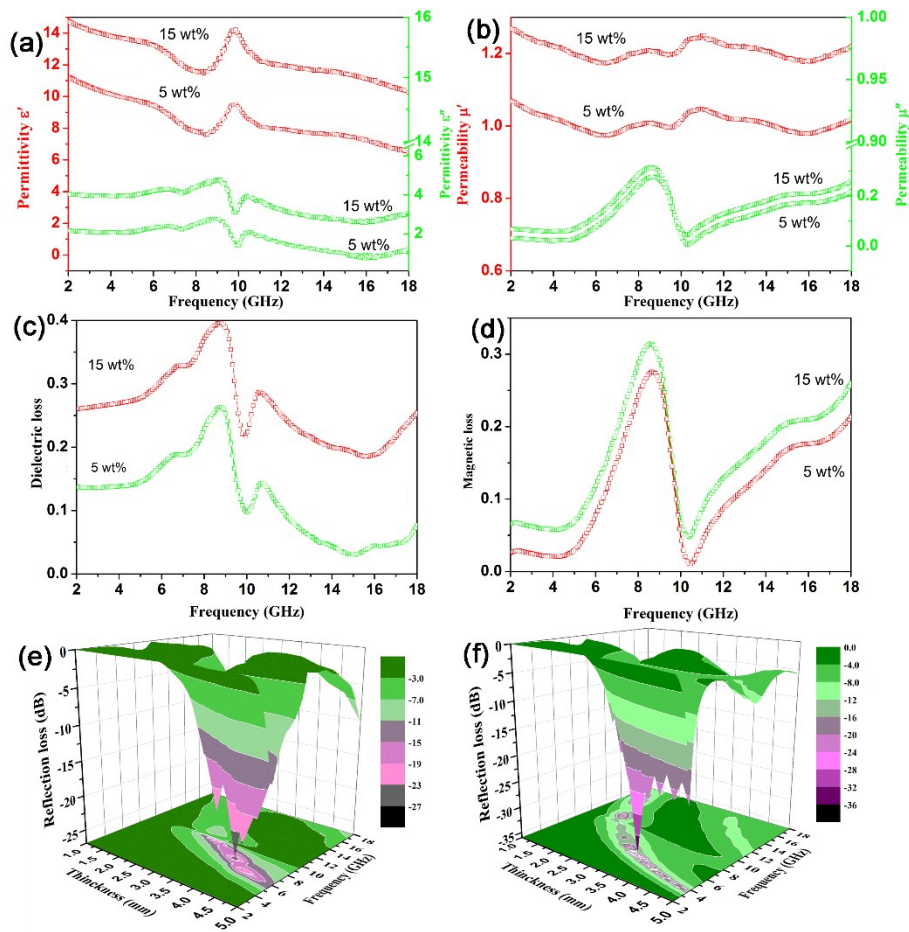

Fig. S3 Relative permittivity (a) and dielectric loss (c), relative permeability (b) and magnetic loss (d) of C/Fe<sub>3</sub>O<sub>4</sub>-wax composites with different loadings, and 3D representation of the  $R_L$  of C/Fe<sub>3</sub>O<sub>4</sub>-wax composites with loadings of 5 wt% (e) and 15 wt% (f) at thicknesses ranging from 1.0 to 5.0 mm in the frequency range 2-18 GHz.

With the increase of C/Fe<sub>3</sub>O<sub>4</sub> loading (from 5 wt % to 15 wt %), significant enhancement is achieved in both real ( $\epsilon'$ ) and imaginary ( $\epsilon''$ ) permittivity (Fig. S3a). The increment of  $\epsilon'$  may be attributed to the fact that the increasing loading ratio of C/Fe<sub>3</sub>O<sub>4</sub> increases the dipolar polarization.<sup>1,2</sup> Furthermore, the values of  $\epsilon''$  (Fig. S3a) and  $\tan \delta\epsilon$  (Fig. S3c) both increase with the filler loading ratio. Similarly, the increase of loading amount also leads to both real ( $\mu_r'$ ) and imaginary ( $\mu_r''$ ) permeability increasing. However, not only the increase of loading amount can lead to high electromagnetic absorption. Because the frequency range is 2–18 GHz, the source-to-shield distance is greater than the free-space wavelength. Thus, the measurements are considered under the condition of far field,<sup>3</sup> and the most effective absorption is exhibited when the impedance match between absorbers and free space is achieved.<sup>1,4</sup> Based on the above EM parameters at the given frequency and thickness layer, The minimum  $R_L$  value of C/Fe<sub>3</sub>O<sub>4</sub> (5 wt %)-wax composites can only reach -26.9 dB with a sample thickness of 3.8 mm at 7.76 GHz (Fig. S3e). Although adding the

C/Fe<sub>3</sub>O<sub>4</sub> loading (15 wt %), the minimum  $R_L$  value reach only up to -35.1 dB with a sample thickness of 3.4 mm at 5.66 GHz (Fig. s3f). Therefore adding large or small amount of absorbents is harmful to the impedance match and results in strong reflection and weak absorption.<sup>5</sup> In addition, the high loading of C/Fe<sub>3</sub>O<sub>4</sub> in this composite can cause damage to the waveabsorption of materials, due to the occurrence of a significant skin effect when its surface is irradiated by microwave.<sup>6</sup>

1 F. Wu, A. Xie, M. Sun, Y. Wang and M. Wang, *J. Mater. Chem. A*, 2015, **3**, 14358.

2 W. Song, M. Cao, L. Fan, M. Lu, Y. Li, C. Wang and H. Ju, *Carbon*, 2014, **77**, 130.

3 N. F. Colaneri and L. W. Shacklette, *IEEE Trans. Instrum. Meas.*, 1992, **41**,291.

4 W. Song, M. Cao, Z. Hou and J. Yuan, *Scr. Mater.*, 2009, **61**, 201.

5 C. Wang, X. J. Han, P. Xu, X. L. Zhang, Y. C. Du, S. R. Hu, J. Y. Wand and X. H. Wang, *Appl. Phys. Lett.*, 2011, **98**, 072906.

6 S. He, G. S. Wang, C. Lu, J. Liu, B. Wen, H. Liu, L. Guo and M. S. Cao, *J. Mate. Chem. A*, 2013, **1**, 4685.
